# Supplementary material for: Facile synthesis of air-stable nano/submicro dendritic copper structures and their anti-oxidation properties
Source: Royal Society of Chemistry journal article supplement (doi:10.1039/c4ra04576a), 2014-01-01
Supplement: c4ra04576a1.pdf [file c4ra04576a1.pdf]

Electronic supplementary information

## Facile synthesis of air-stable dendritic copper nanostructures and their anti-oxidation properties

Xue Liu, Shao-Fan Zhao, Yang Shao and Ke-Fu Yao \*

School of Materials Science and Engineering, Tsinghua University, Beijing 100084, People's Republic of China

Corresponding author: Ke-Fu Yao. E-mail: kfyao@tsinghua.edu.cn.  
Phone: +86-10-62772292. Fax: +86-10-62770190.

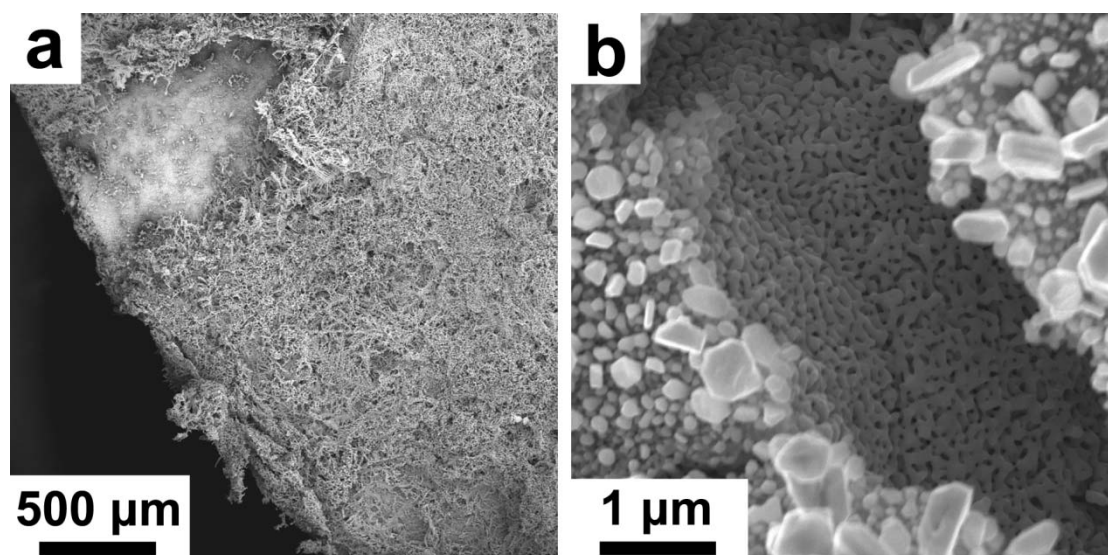

**Fig. S1** SEM images of (a) the sample dealloyed for 2 days with part of the dendritic copper structure (DCS) scraped off and (b) the enlarged image of the exposed nanoporous substrate.

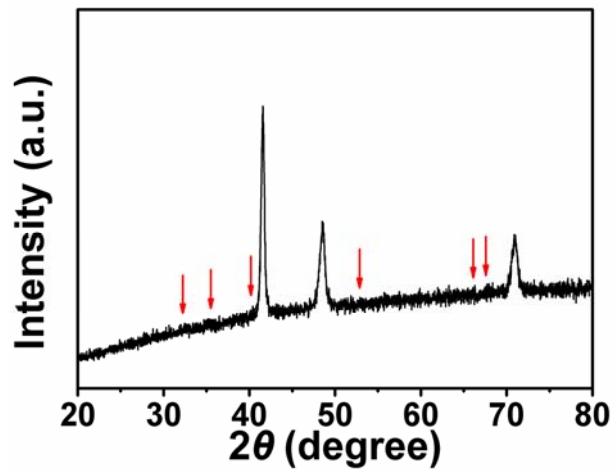

**Fig. S2** XRD spectra of the as-prepared Cu-Mn-O alloy with scanning rate of 3 degrees per min.

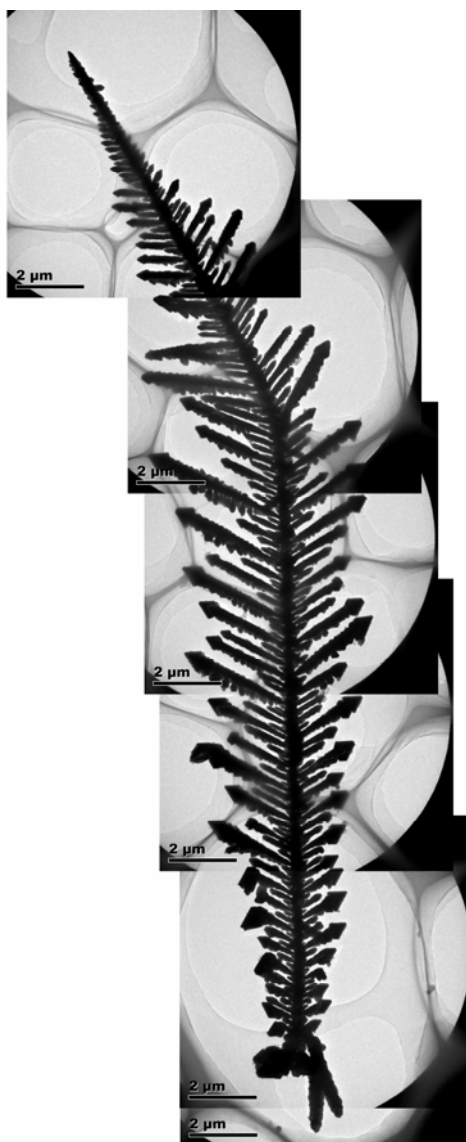

**Fig. S3** The TEM bright field image of a DCS.

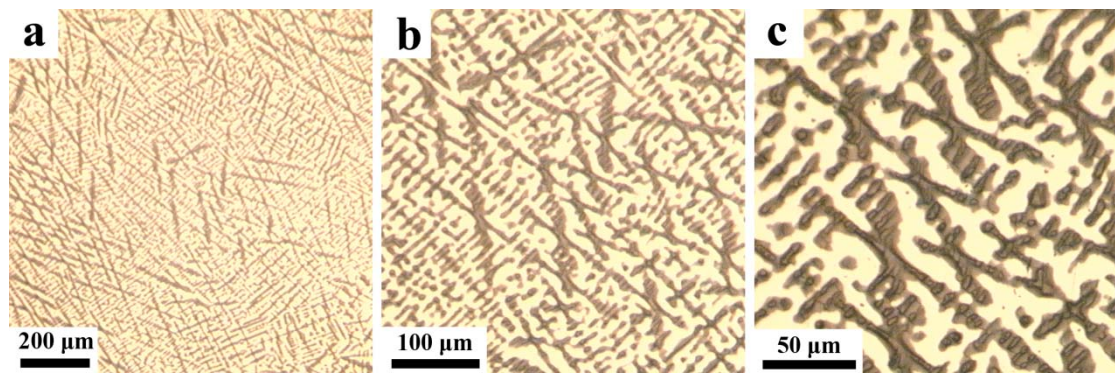

**Fig. S4** Optical images of the polished Cu-Mn-O ingot section after nital etching.

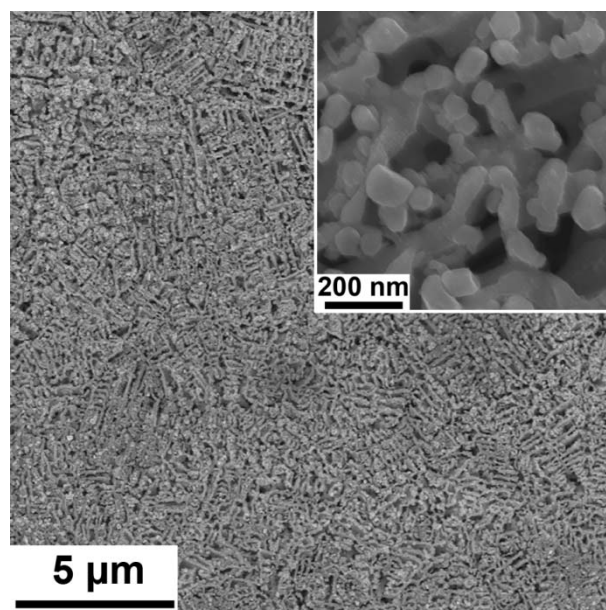

**Fig. S5** SEM image of Cu-Mn sample after dealloying in 0.5 M hydrochloric acid for 2 h with its enlarged image in the inset.
